# Supplementary material for: Histidine-based copper tetrapeptides as enantioselective catalysts for aldol reactions
Source: Royal Society of Chemistry journal article supplement (doi:10.1039/c8ra06814c), 2018-01-01
Supplement: c8ra06814c1.pdf [file c8ra06814c1.pdf]

### SUPPLEMENTARY INFORMATION

| List          | Caption                                                                                                                                                                               |
|---------------|---------------------------------------------------------------------------------------------------------------------------------------------------------------------------------------|
| S.I. Table 1  | Physical properties of peptides and their CuP.                                                                                                                                        |
| S.I. Table 2  | The secondary structures of peptides and their CuP analyzed at different temperatures.                                                                                                |
| S.I. Table 3  | UV and FTIR spectral analysis of peptides and their CuP.                                                                                                                              |
| S.I. Table 4  | Raw data of HPLC analysis of aldol adducts for Reaction 1 and 2.                                                                                                                      |
| S.I. Scheme 1 | SPPS Scheme of P1.                                                                                                                                                                    |
| S.I. Figure 1 | CD spectra of P1-P3 and their copper(II)-peptides analyzed at room temperature (25°C) indicating the secondary structures opted by their highest percentage as shown in S.I. Table 2. |
| S.I. Figure 2 | FTIR analysis of P1-P3 and CuP1-CuP3.                                                                                                                                                 |
| S.I. Figure 3 | FTIR analysis of P4, CuP4, P5 and CuP5.                                                                                                                                               |
| S.I. Figure 4 | UV-Vis spectrum of P1-P5.                                                                                                                                                             |
| S.I. Figure 5 | LC-MS of peptides P1-P5.                                                                                                                                                              |
| S.I. Figure 6 | HPLC chromatograms of aldol reaction between <i>p</i> -nitrobenzaldehyde & cyclohexanone.                                                                                             |

**S.I. Table 1** Physical properties of their peptides and copper(II)-peptides listing the yield and purity in terms of percentage, melting/decomposing point and their chiral optical rotation value at room temperature (25°C).

| <b>P/CuP</b> | <b>% Yield</b> | <b>% Purity</b> | <b>Melting point/°C</b> | <b><math>\alpha</math>[D]<sup>25°C</sup></b> |
|--------------|----------------|-----------------|-------------------------|----------------------------------------------|
| <b>P1</b>    | 74.0           | 80.0            | 191.0 (m)               | -12                                          |
| <b>CuP1</b>  | 65.0           |                 | 205.2 (d)               | 214                                          |
| <b>P2</b>    | 74.2           | 84.0            | 210.0 (m)               | -14                                          |
| <b>CuP2</b>  | 56.0           |                 | 220.6 (d)               | 85                                           |
| <b>P3</b>    | 83.1           | 73.0            | 200.0 (m)               | 1                                            |
| <b>CuP3</b>  | 53.3           |                 | 208.5 (d)               | 93                                           |
| <b>P4</b>    | 70.0           | 99.5            | 162.4 (m)               | -10                                          |
| <b>CuP4</b>  | 48.1           |                 | 245.0 (d)               | 227                                          |
| <b>P5</b>    | 65.6           | 99.2            | 130.0 (m)               | -4                                           |
| <b>CuP5</b>  | 49.6           |                 | 210.6 (d)               | 460                                          |

m-melted d-decomposed

**S.I. Table 2** The secondary structures of peptides and their CuP analyzed at different temperatures

| <b>Peptides</b> | <b>Secondary structures</b> |                                          |                        |
|-----------------|-----------------------------|------------------------------------------|------------------------|
|                 | <b>4°C</b>                  | <b>25°C</b>                              | <b>60°C</b>            |
| <b>P1</b>       | $\beta$ -sheet (53.2%)      | <b><math>\beta</math>-sheet (52.2%)</b>  | $\beta$ -sheet (38.3%) |
| <b>CuP1</b>     | Random (67.2%)              | <b>Random (67.6%)</b>                    | Random (71.5%)         |
| <b>P2</b>       | Random (62.8%)              | <b><math>\beta</math>-sheet (82.9%)</b>  | $\beta$ -sheet (82.9%) |
| <b>CuP2</b>     | Random (58.6%)              | <b>Random (68.7%)</b>                    | Random (70.7%)         |
| <b>P3</b>       | Random (50.7%)              | <b>Random (47.5%)</b>                    | Random (53.2%)         |
| <b>CuP3</b>     | $\beta$ -turn (57.2%)       | <b>Random (42.4%)</b>                    | Random (81.4%)         |
| <b>P4</b>       | $\beta$ -sheet (40.9%)      | <b><math>\beta</math>-sheet (38.1%)</b>  | $\beta$ -sheet (75.8%) |
| <b>CuP4</b>     | $\beta$ -sheet (49.6%)      | <b><math>\alpha</math>-helix (39.5%)</b> | $\beta$ -sheet (96.3%) |
| <b>P5</b>       | $\beta$ -sheet (80.1%)      | <b><math>\beta</math>-sheet (40.2%)</b>  | $\beta$ -sheet (80.3%) |
| <b>CuP5</b>     | $\beta$ -sheet (53.4%)      | <b>Random (38.3%)</b>                    | $\beta$ -turn (43.9%)  |

**S.I Table 3** UV spectral analysis of P1-P5 and copper bound to P1-P5 in compliment with the FTIR spectral analysis with the peak assignments

| P/MP | UV Spectral Analysis |                                                                               |                  | FTIR Analysis                                               |                                        |
|------|----------------------|-------------------------------------------------------------------------------|------------------|-------------------------------------------------------------|----------------------------------------|
|      | $\lambda/\text{nm}$  | UV-Visible<br>$\log \epsilon/\text{L}\cdot\text{cm}^{-1}\cdot\text{mol}^{-1}$ | Assignment       | Wavenumber ( $\nu$ )<br>(type of peak)/<br>$\text{cm}^{-1}$ | Assignment                             |
| P1   |                      |                                                                               |                  | 3277 (s,sh)                                                 | 2° amine (3280-3250 $\text{cm}^{-1}$ ) |
|      |                      |                                                                               |                  | 1251 (w,sh)                                                 | C-N (imidazole ring)                   |
|      |                      |                                                                               |                  | 1188 (s,sh)                                                 | C-O stretch of COOH                    |
|      |                      |                                                                               |                  | 1626 (s,sh)                                                 | Amide I & C=O bond                     |
|      |                      |                                                                               |                  | 1437 (w,b)                                                  | Amide II                               |
|      |                      |                                                                               |                  | 1538 (s,sh)                                                 |                                        |
| P2   |                      |                                                                               |                  | 3277 (s,sh)                                                 | 2° amine                               |
|      |                      |                                                                               |                  | 1250 (w,sh)                                                 | C-N (imidazole ring)                   |
|      |                      |                                                                               |                  | 1180 (s,sh)                                                 | C-O stretch of COOH                    |
|      |                      |                                                                               |                  | 1628 (s,sh)                                                 | Amide I & C=O bond                     |
|      |                      |                                                                               |                  | 1434 (w,b)                                                  | Amide II                               |
|      |                      |                                                                               |                  | 1540 (s,sh)                                                 |                                        |
| P3   |                      |                                                                               |                  | 3279 (s,sh)                                                 | 2° amine                               |
|      |                      |                                                                               |                  | 1255 (w,sh)                                                 | C-N (imidazole ring)                   |
|      |                      |                                                                               |                  | 1183 (s,sh)                                                 | C-O stretch of COOH                    |
|      |                      |                                                                               |                  | 1628 (s,sh)                                                 | Amide I & C=O bond                     |
|      |                      |                                                                               |                  | 1433 (w,b)                                                  | Amide II                               |
|      |                      |                                                                               |                  | 1537 (s,sh)                                                 |                                        |
| P4   |                      |                                                                               |                  | 3298 (s,sh)                                                 | 1° amine (3400-3280 $\text{cm}^{-1}$ ) |
|      |                      |                                                                               |                  | 1266 (w,sh)                                                 | C-N (imidazole ring)                   |
|      |                      |                                                                               |                  | 1133 (s,sh)                                                 | C-O stretch of COOH                    |
|      |                      |                                                                               |                  | 1659 (s,sh)                                                 | Amide I & C=O bond                     |
|      |                      |                                                                               |                  | 1431 (w,sh)                                                 | Amide II                               |
|      |                      |                                                                               |                  | 1546 (s,sh)                                                 |                                        |
| P5   |                      |                                                                               |                  | 3318 (s,sh)                                                 | 1° amine                               |
|      |                      |                                                                               |                  | 1138 (s,sh)                                                 | C-O stretch of COOH                    |
|      |                      |                                                                               |                  | 1650 (s,sh)                                                 | Amide I & C=O bond                     |
|      |                      |                                                                               |                  | 1431 (w,sh)                                                 | Amide II                               |
|      |                      |                                                                               |                  | 1522 (s,sh)                                                 |                                        |
| CuP1 | 714                  | 2.04                                                                          | d-d transition   |                                                             |                                        |
|      | 458                  | 1.98                                                                          | charge transfer  |                                                             |                                        |
|      | 239                  | 3.84                                                                          | Cu-N=C imidazole |                                                             |                                        |
| CuP2 | 708                  | 1.60                                                                          | d-d transition   |                                                             |                                        |
|      | 530                  | 1.72                                                                          | charge transfer  |                                                             |                                        |
|      | 268                  | 3.74                                                                          | Cu-N=C imidazole |                                                             |                                        |
| CuP3 | 737                  | 2.17                                                                          | d-d transition   |                                                             |                                        |
|      | 648                  | 2.23                                                                          | charge transfer  |                                                             |                                        |
|      | 270                  | 3.85                                                                          | Cu-N=C imidazole |                                                             |                                        |
| CuP4 | 747                  | 2.31                                                                          | d-d transition   |                                                             |                                        |
|      | 518                  | 1.25                                                                          | charge transfer  |                                                             |                                        |
|      | 307                  | 2.60                                                                          | Cu-N=C imidazole |                                                             |                                        |
| CuP5 | 749                  | 1.16                                                                          | d-d transition   |                                                             |                                        |
|      | 264                  | 1.93                                                                          | Cu-N=C imidazole |                                                             |                                        |

All the bands observed for peptides were observed here. Another amide II band was observed around 1460  $\text{cm}^{-1}$  (s,sh) for all the copper peptides. Another peak (s,b) was observed in the range 3400-3600  $\text{cm}^{-1}$  due to a combination of the 2° amine and acetate (COO) from the copper(II) acetate [25].  
s-strong, w- weak, sh-sharp, b-broad

**S.I. Table 4** HPLC CHIRALCAK column analysis of aldol enantiomers from Reaction 1 and Reaction 2 with different catalysts

| Catalyst                       | (S)-2-[(R)-hydroxy(4-nitrophenyl)methyl] cyclohexan-1-one |                      |          |          | (S)-2-[(R)-hydroxy(4-methoxyphenyl)methyl] cyclohexan-1-one |                      |          |          |
|--------------------------------|-----------------------------------------------------------|----------------------|----------|----------|-------------------------------------------------------------|----------------------|----------|----------|
|                                | R <sub>T</sub> A/min                                      | R <sub>T</sub> B/min | % Area A | % Area B | R <sub>T</sub> A/min                                        | R <sub>T</sub> B/min | % Area A | % Area B |
| <b>No catalyst<sup>a</sup></b> | 10.2                                                      | -                    | 97.1     | -        | 7.50                                                        | -                    | 1.24     | -        |
| <b>Proline<sup>b</sup></b>     | 10.3                                                      | 14.9                 | 86.6     | 13.4     | 7.50                                                        | 10.4                 | 62.0     | 0.190    |
| <b>P1</b>                      | 10.9                                                      | 15.3                 | 3.30     | 2.10     | 7.50                                                        | -                    | 13.7     | -        |
| <b>CuP1</b>                    | 10.8                                                      | 14.5                 | 35.2     | 2.40     | 7.46                                                        | 10.2                 | 85.9     | 1.98     |
| <b>P2</b>                      | 10.6                                                      | 14.7                 | 10.6     | 16.9     | 7.50                                                        | -                    | 3.41     | -        |
| <b>CuP2</b>                    | 10.5                                                      | 14.5                 | 80.5     | 4.80     | 7.50                                                        | 10.2                 | 7.03     | 1.33     |
| <b>P3</b>                      | 10.7                                                      | 14.6                 | 68.2     | 1.98     | 7.50                                                        | 10.2                 | 11.1     | 0.140    |
| <b>CuP3</b>                    | 10.6                                                      | 14.4                 | 18.5     | 2.03     | 7.50                                                        | 10.2                 | 9.14     | 0.430    |
| <b>P4</b>                      | 10.7                                                      | 14.4                 | 75.2     | 0.750    | 7.49                                                        | 10.2                 | 32.9     | 0.260    |
| <b>CuP4</b>                    | 10.5                                                      | -                    | 96.0     | -        | 7.50                                                        | -                    | 1.60     | -        |
| <b>P5</b>                      | No product peaks at 10-15 mins                            |                      |          |          | 7.49                                                        | 10.3                 | 87.2     | 0.420    |
| <b>CuP5</b>                    | 10.7                                                      | -                    | 16.08    | -        | 7.49                                                        | 10.3                 | 17.0     | 0.490    |

$$\%ee = [(Peak\ Area\ A\ (R) - Peak\ Area\ B\ (S)) / (Peak\ Area\ A\ (R) + Peak\ Area\ B\ (S))] * 100$$

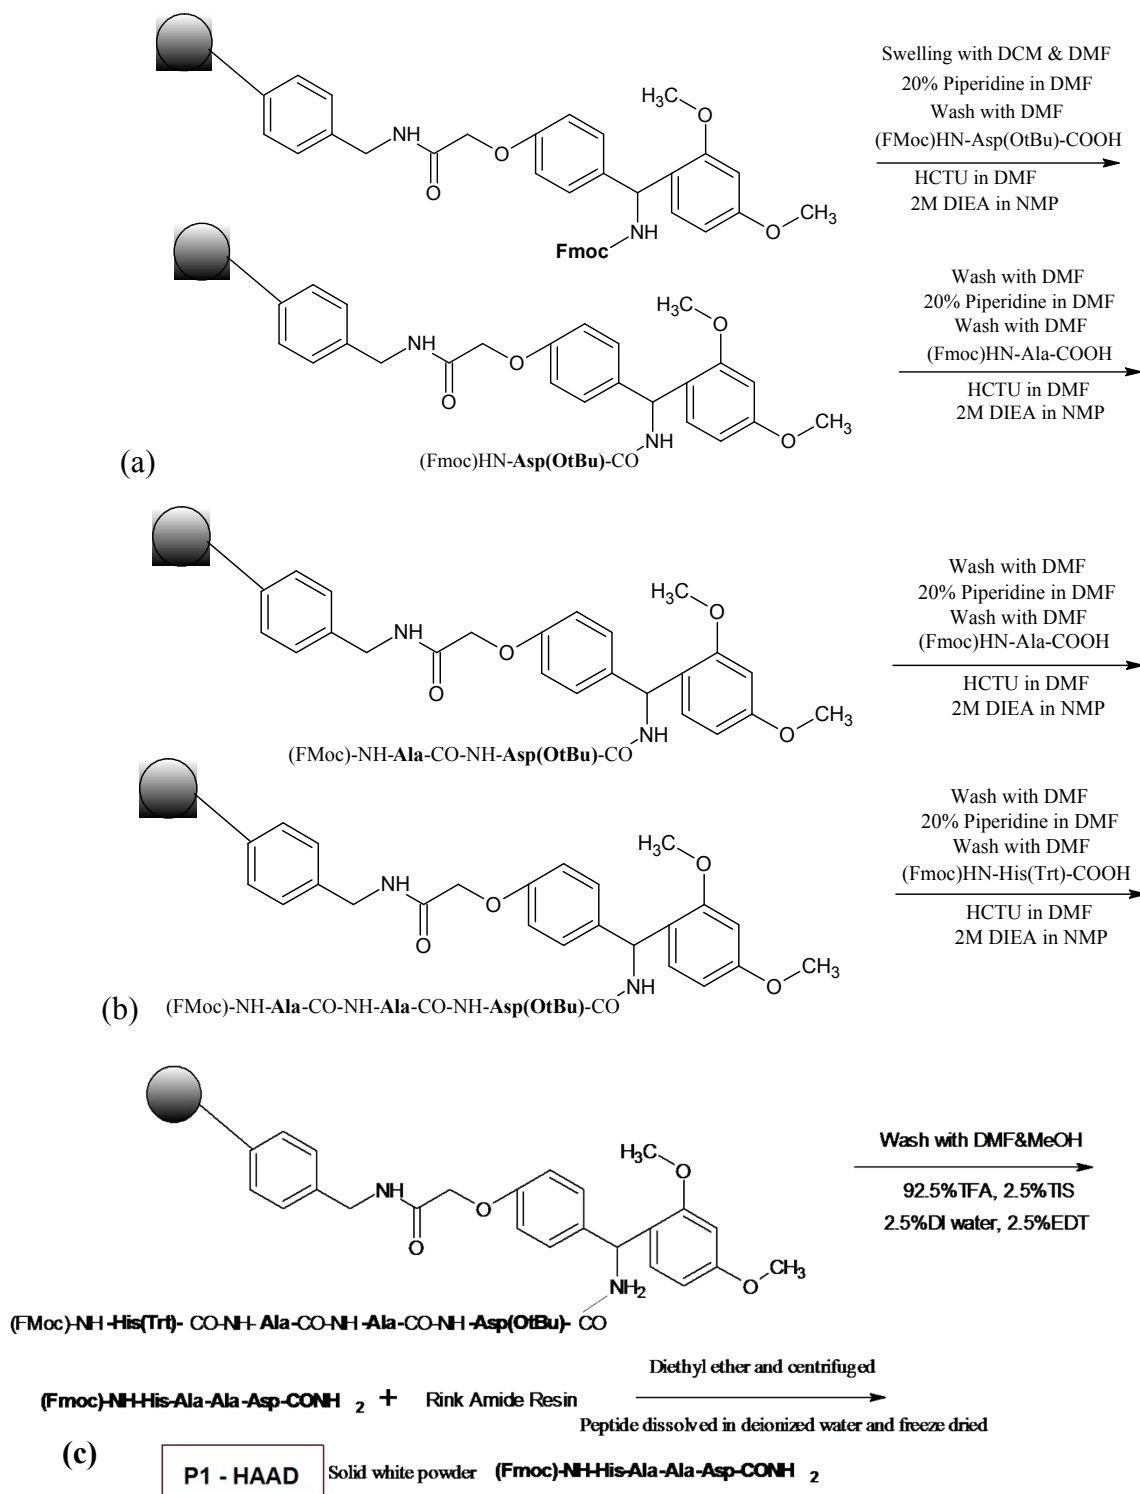

**S.I. Scheme 1** SPPS scheme of P1; (a) Fmoc deprotection of rink amide resin and coupling of 1<sup>st</sup> amino acid from C-terminal; (b) Fmoc deprotection of 1<sup>st</sup> amino acid and coupling of 2<sup>nd</sup> and 3<sup>rd</sup> amino acid; (c) Fmoc deprotection of 2<sup>nd</sup> and 3<sup>rd</sup> amino acid and coupling of final (4<sup>th</sup>) amino acid; (d) Cleaving peptide from resin using cleavage cocktail mixture.

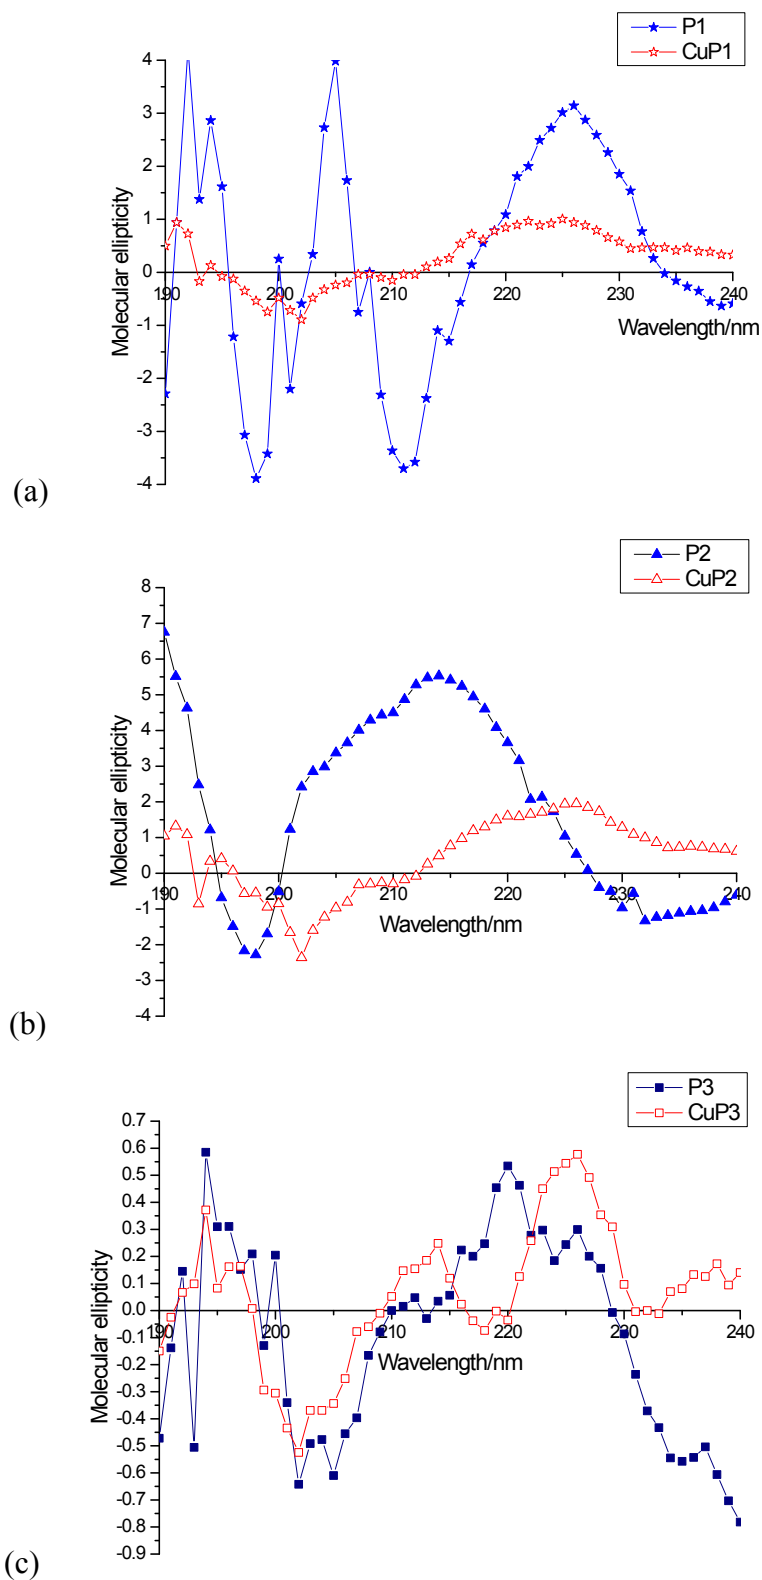

**S.I. Figure 1** CD spectra of (a) P1 & CuP1 (5 mM, 400  $\mu$ L), (b) P2 & CuP2 (5 mM, 400  $\mu$ L) and (c) P3 & CuP3 (5 mM, 400  $\mu$ L) analyzed at room temperature (25°C), their secondary structures opted by their highest percentage as shown in S.I. Table 2.

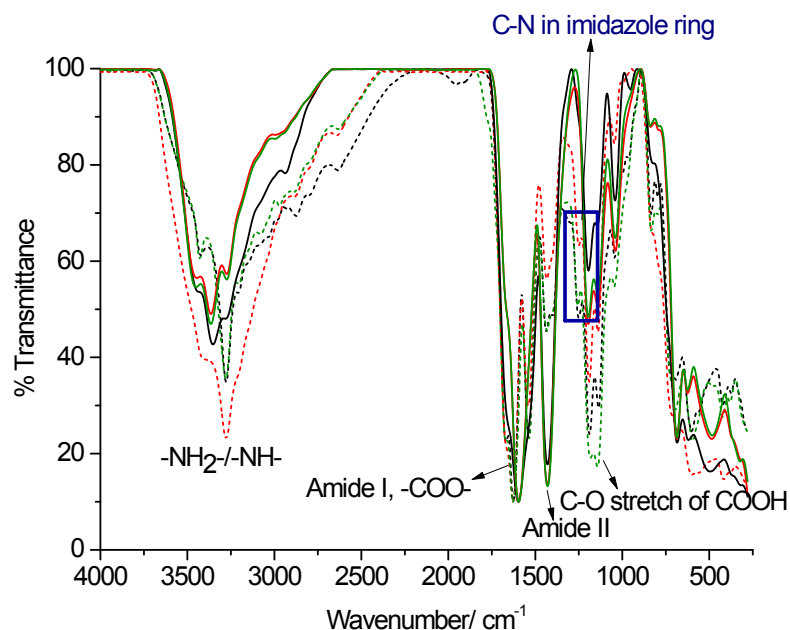

**S.I. Figure 2** FTIR analysis of the P1-P3 and CuP1-CuP3. The dotted lines represent the peptides while the solid lines of the same colour represent the respective copper(II)-peptides; black: P1, red: P2 and green: P3. Most of the major peaks as assigned in the graph were shifted to the right for copper-peptides as compared to their parent peptides (in the range of 2000-500  $\text{cm}^{-1}$ ). The amide peaks (terminal end) of copper(II) peptides were shifted to the left when compared to their peptides (3400-3200  $\text{cm}^{-1}$ ).

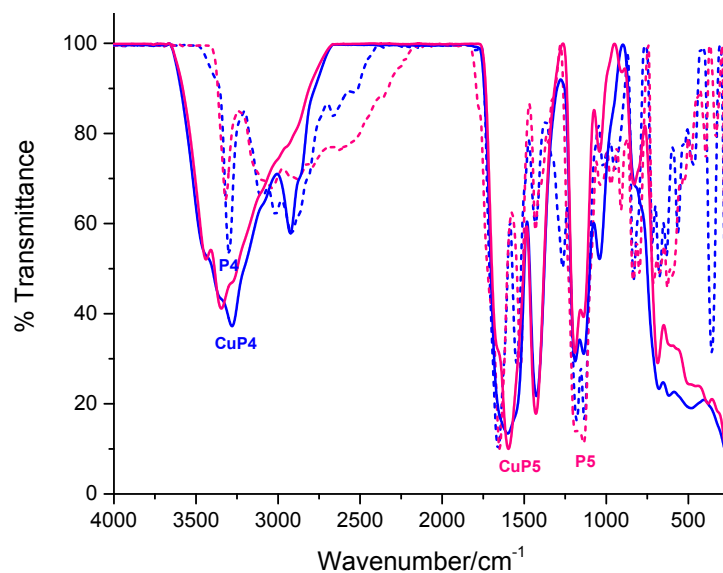

**S.I. Figure 3** FTIR analysis of P4, CuP4, P5 and CuP5. The dotted lines represent the peptides while the solid lines of the same colour represent the respective copper(II)-peptides; blue: P4 and pink: P5.

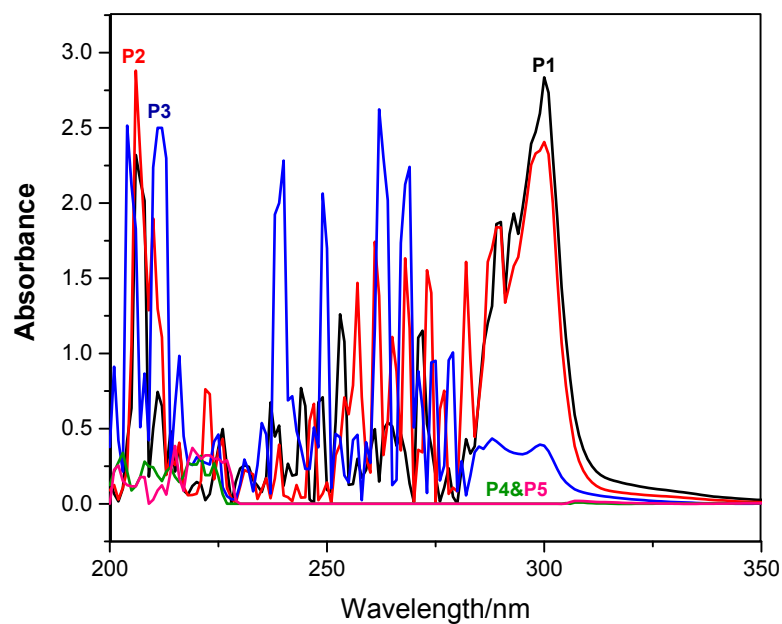

**S.I. Figure 4** UV-Vis spectrum of P1-P5. 0.1M of P1-P3 are denoted by black, red and blue dotted lines, respectively, where as 0.01 M of P4 and P5 are denoted by green and pink dotted lines, respectively. The transitions that include  $n-\pi^*$  and  $\pi-\pi^*$  (peptides) appear around 270- 330 nm and 200-270 nm respectively. These transitions occur due to the presence of double bonds, cyclised rings and aromatic rings of the amino acids and amide bonds [21]. Hence they appear as several peaks clustered together as observed in the spectra of peptides.



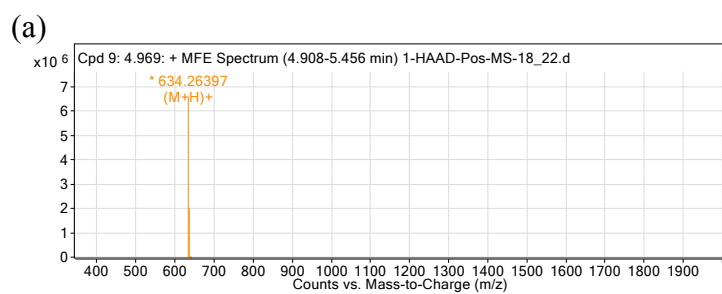

| Compound Label | $m/z$     | RT    | Algorithm                 | Mass      |
|----------------|-----------|-------|---------------------------|-----------|
| HAAD Fmoc      | 634.26397 | 4.969 | Find by Molecular Feature | 633.25686 |

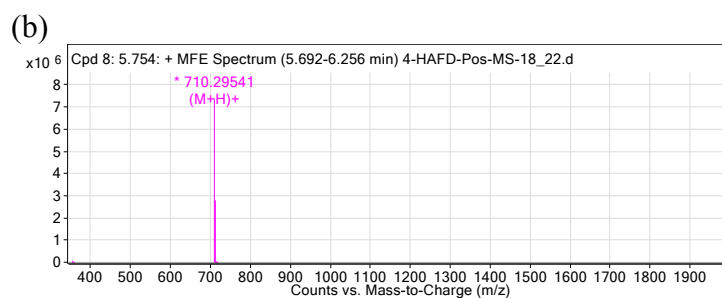

| Compound Label | $m/z$     | RT    | Algorithm                 | Mass      |
|----------------|-----------|-------|---------------------------|-----------|
| HAFD w Fmoc    | 710.29541 | 5.754 | Find by Molecular Feature | 709.28869 |

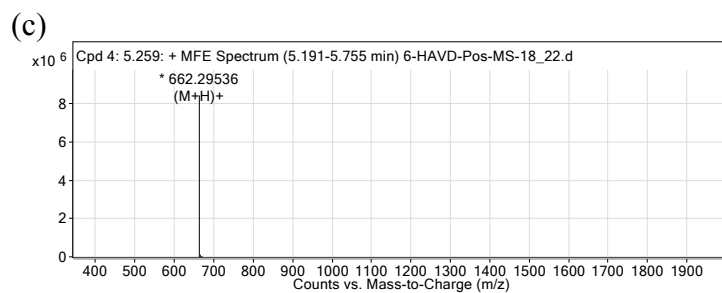

| Compound Label | $m/z$     | RT    | Algorithm                 | Mass      |
|----------------|-----------|-------|---------------------------|-----------|
| HAVD Fmoc      | 662.29536 | 5.259 | Find by Molecular Feature | 661.28848 |

(d)

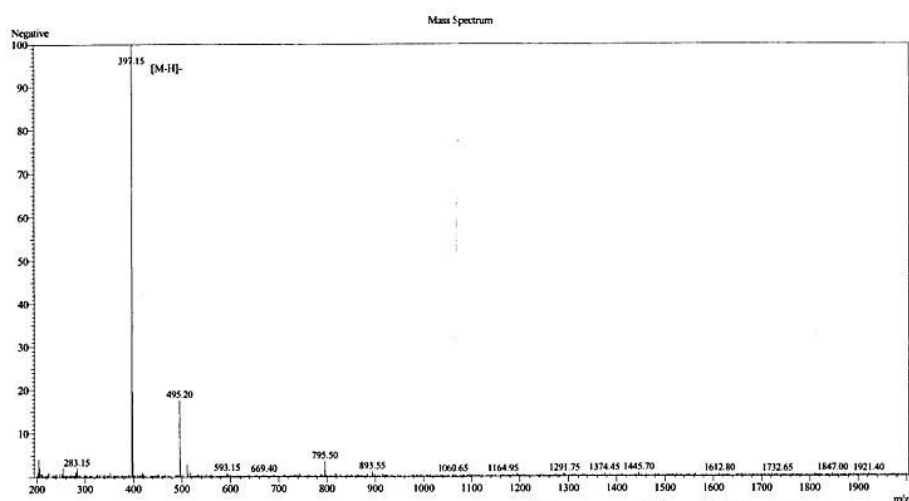

| Compound Label | <i>m/z</i> | RT    | Algorithm                 | Mass     |
|----------------|------------|-------|---------------------------|----------|
| AGHD w/o Fmoc  | 398.4032   | 7.242 | Find by Molecular Feature | 397.1503 |

(e)

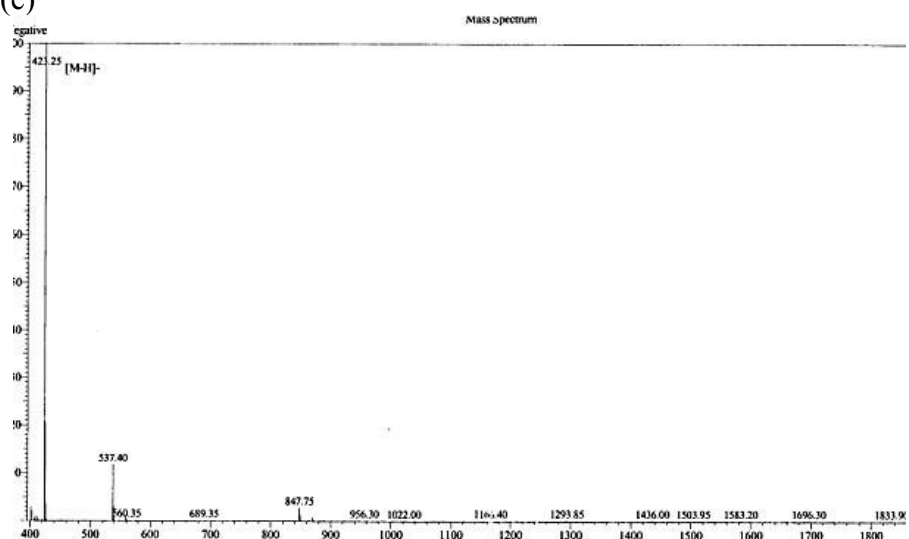

| Compound Label | <i>m/z</i> | RT    | Algorithm                 | Mass     |
|----------------|------------|-------|---------------------------|----------|
| PGHD wo Fmoc   | 424.42     | 7.690 | Find by Molecular Feature | 423.2513 |

S.I. Figure 5 LC-MS of peptides P1-P5.

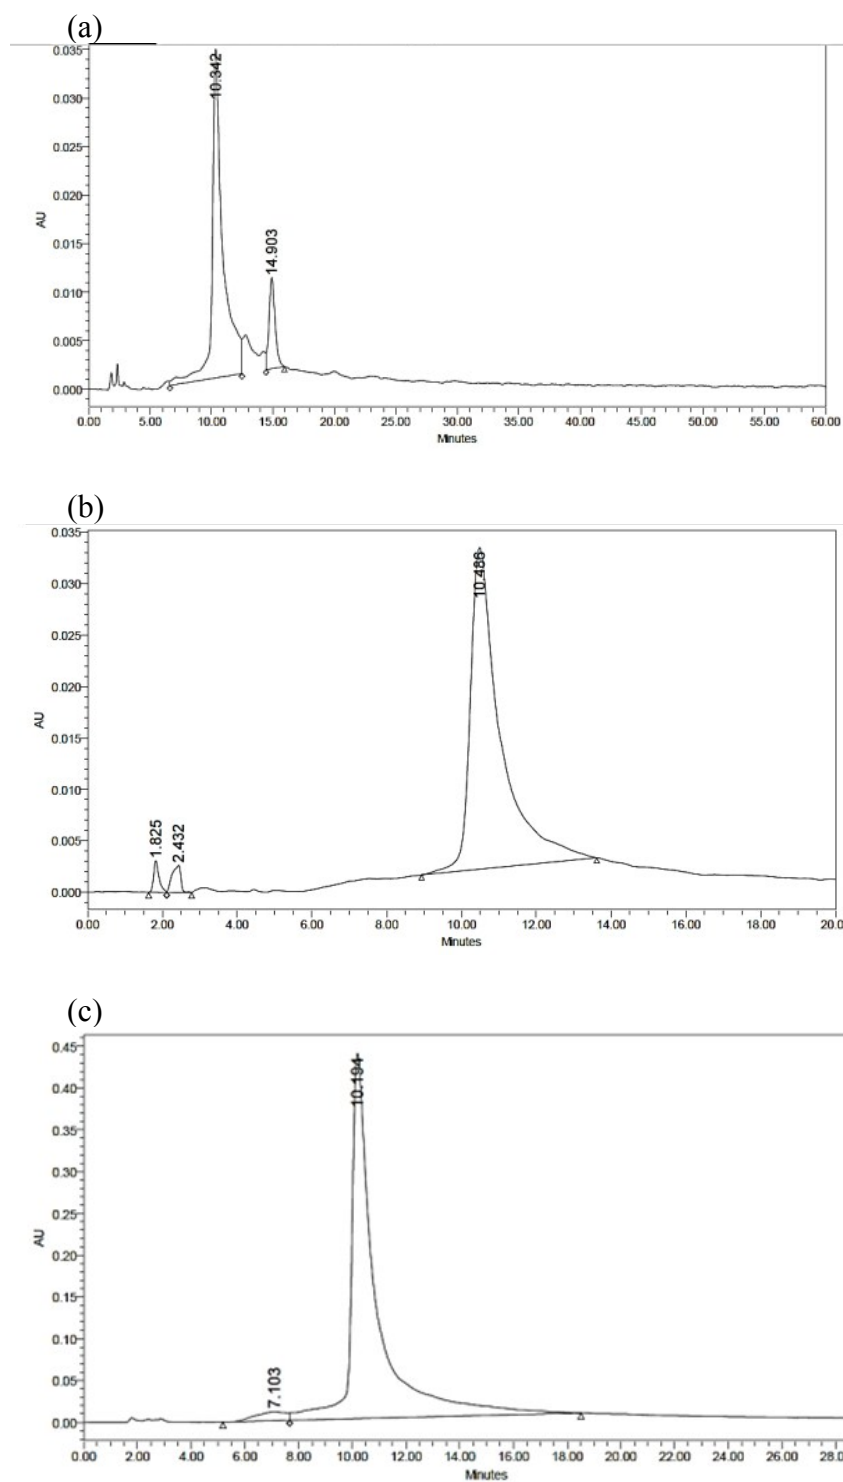

**S.I. Figure 6** HPLC chromatograms of aldol reaction between p-nitrobenzaldehyde & cyclohexanone with catalysts (a) Proline (b) CuP4 (c) No catalyst.
